# Supplementary material for: Prognostic Impact of a Routine Six-Month Exercise Stress Test after Complex Left Main Bifurcation Percutaneous Intervention
Source: MDPI journal article supplement (doi:10.3390/diagnostics14010059), 2023-12-26
Supplement: s1 [file s1]

# Supplementary File S1

|                                      | <b>T or TAP<br/>N=61 (%)</b> | <b>Culotte<br/>N=98 (%)</b> | <b>NIT<br/>N=172 (%)</b> |
|--------------------------------------|------------------------------|-----------------------------|--------------------------|
| Negative                             | 45 (73.3)*                   | 74 (75.5)                   | 150(87.2)                |
| Inconclusive                         | 6(9.8)                       | 8(8.1)                      | 13(7.5)                  |
| aVr ST elevation > 1mm               | 2(3.3)                       | 5 (5.1)                     | 0                        |
| V3-V6 ST depression >1 mm            | 8 (13.1)*                    | 8(8.1)                      | 6(3.5)                   |
| DIII-aVf depression/elevation >1 mm  | 1(1.6)                       | 2 (2)                       | 0                        |
| ECG only during the stress tests     | 6(9.8)*                      | 9(14.7)**                   | 4(2.3)                   |
| Symptom only during the stress tests | 2(3.3)                       | 2(2)                        | 0                        |
| ECG+Symptoms during the stress tests | 2(3.3)                       | 4 (4.1)                     | 2(1.2)                   |

*\*p<0.05 between NIT and T or TAP; \*\*p<0.05 between NIT and Culotte*
